# Supplementary material for: Post Graduate Urology Training in LMIC
Source: Preprints.org preprint supplement (doi:10.20944/preprints202407.1334.v1), 2024-07-16
Supplement: Supplementary file 1 [file supplementary]

**Supplementary Material: List of SIU-Accredited Training Programs in LMICs**

The Société Internationale D'Urologie (SIU) has accredited several training programs in Low- and Middle-Income Countries (LMICs), encompassing a range of specialties. This supplementary material provides an overview of these accredited programs and their locations.

**Egypt**

1. University of Alexandria

**India**

1. Medanta – The Medicity
2. Medanta Kidney & Urology Institute
3. Muljibhai Patel Urological Hospital
4. Rajiv Gandhi Cancer Institute and Research Centre
5. UROKUL Pune / Kulkarni UroSurgery Institute Pvt Ltd

**Kenya**

1. East Africa Kidney Institute
2. Aga Khan University Hospital

**Nigeria**

1. PIUTA Ibadan Center

**Pakistan**

1. Pakistan Kidney Center

**Tanzania**

1. Institute of Urology at KCMC

**Tunisia**

1. University Sahloul Hospital

Specialties offered by these programs include:

- Endourology
- Laparoscopy
- Renal Transplant
- Prosthesis
- Prostate Cancer
- Urogenital Tumors
- Pediatrics
